# Supplementary material
Source: PubMed Central journal article supplement (PMC3394681)

# Supplemental Figure 1

## Whole Blood Staining

## Double Ficoll-Hypaque

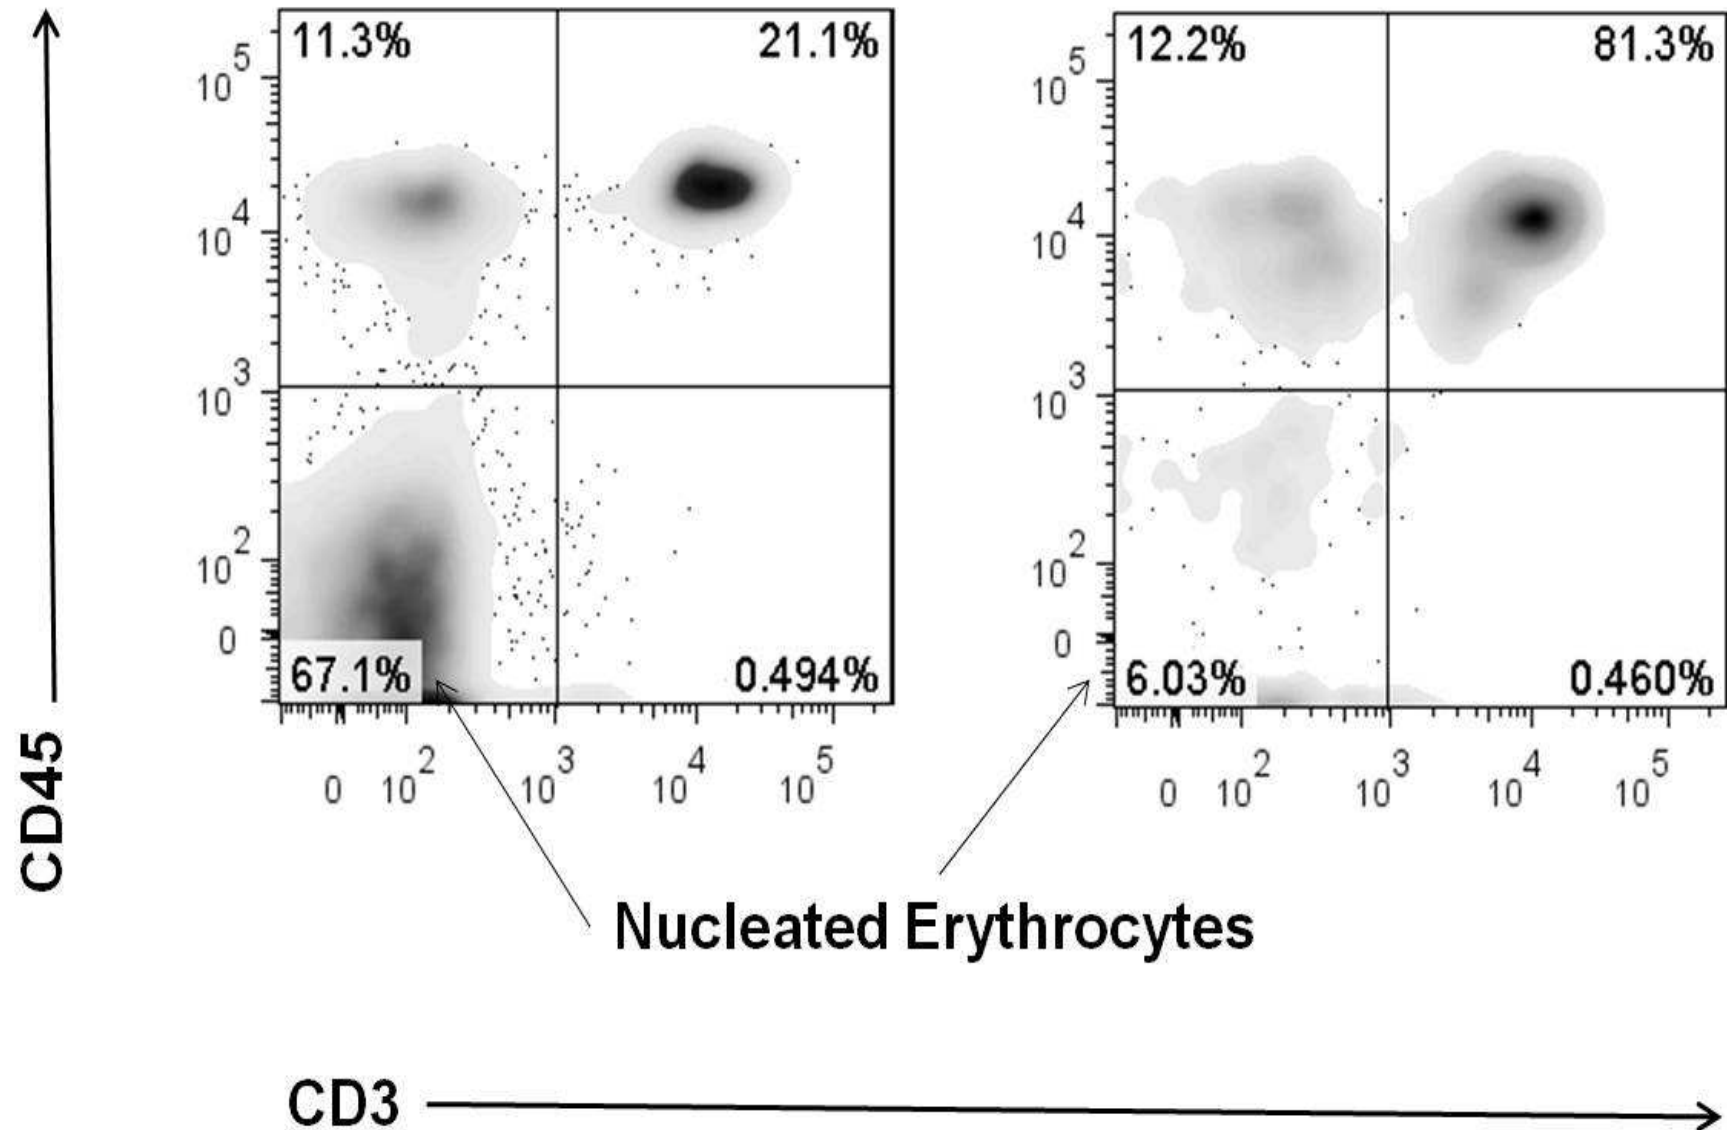

Supplement: NIHMS383601-supplement-1.pdf [file NIHMS383601-supplement-1.pdf]

## Supplemental Figure 2

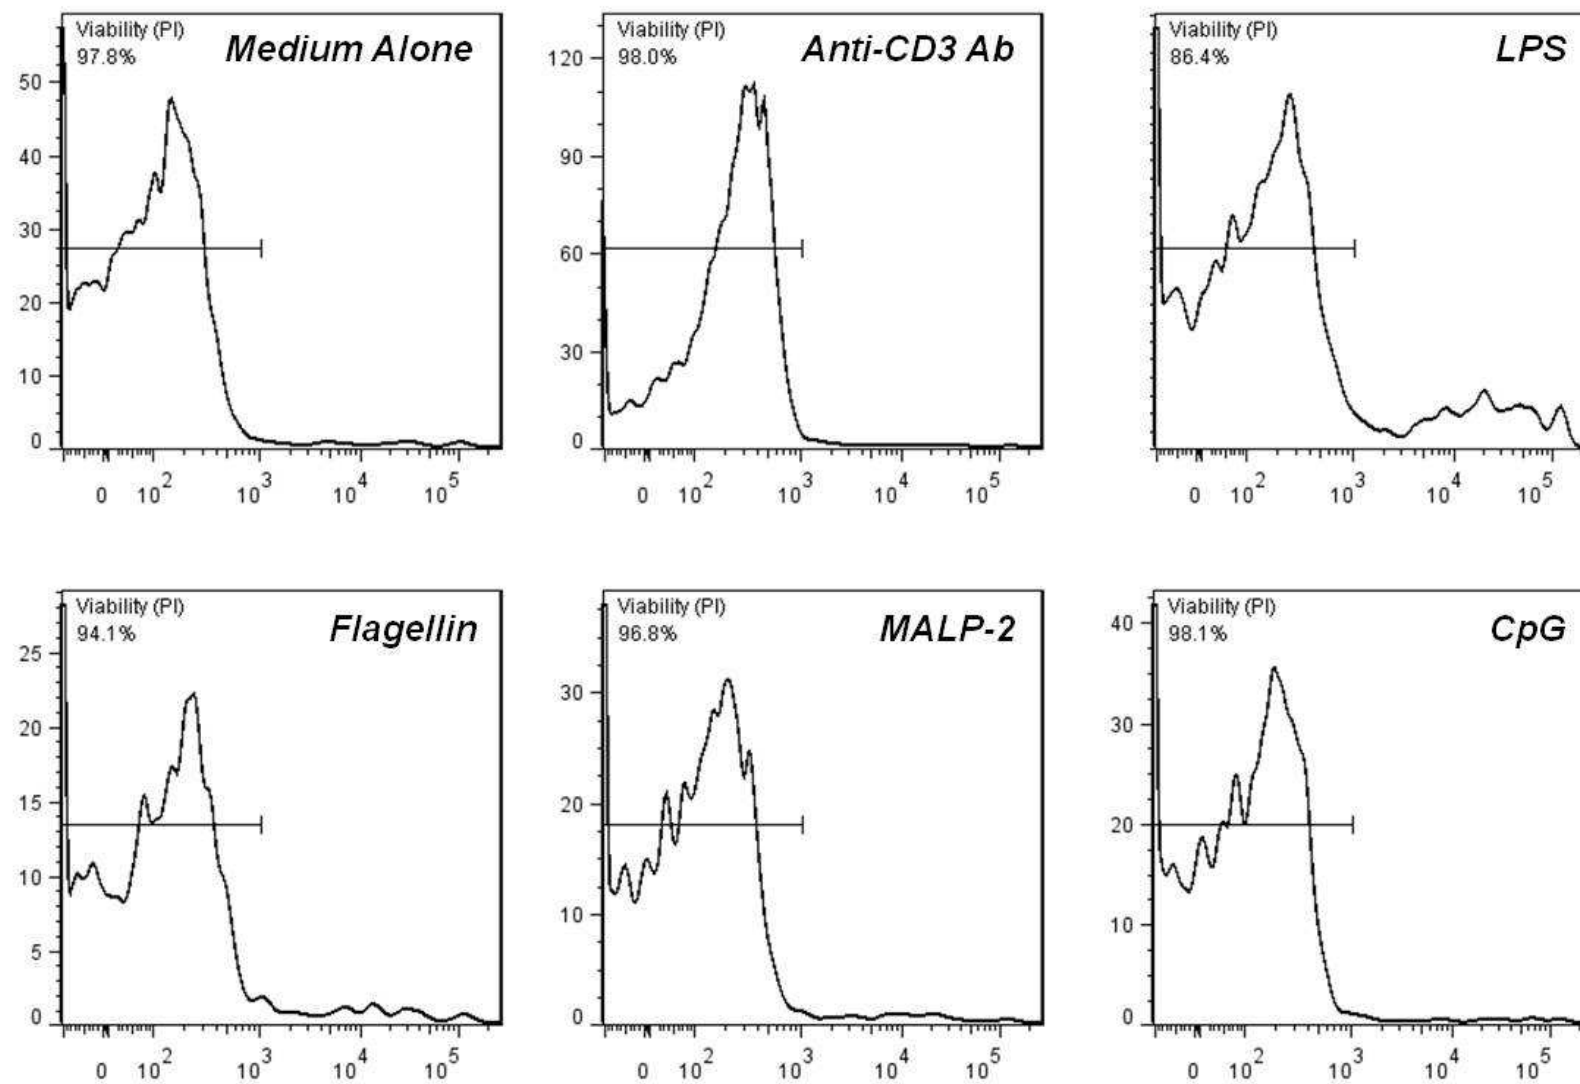

PI 

Supplement: NIHMS383601-supplement-2.pdf [file NIHMS383601-supplement-2.pdf]

# Supplemental Figure 3

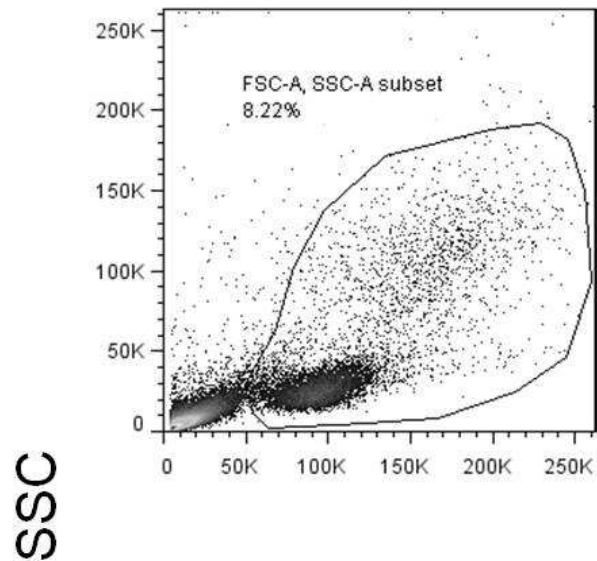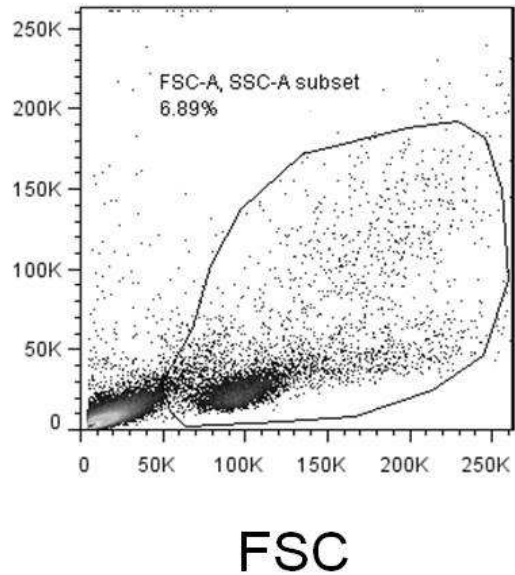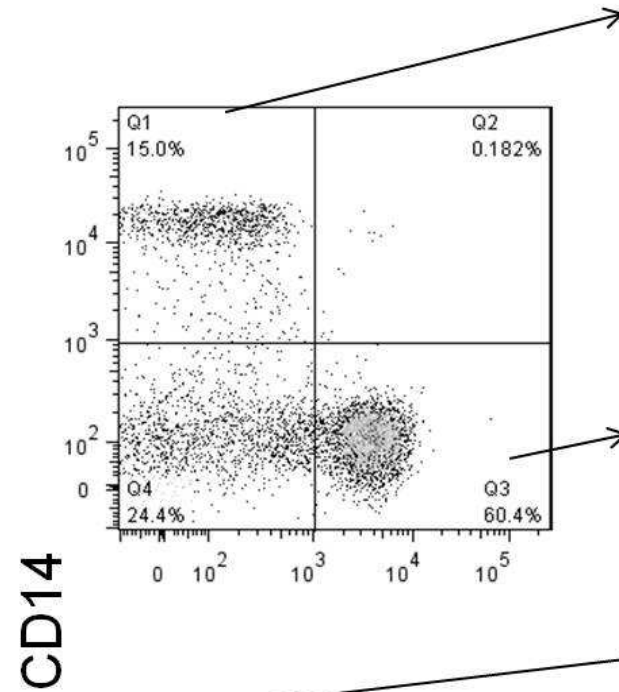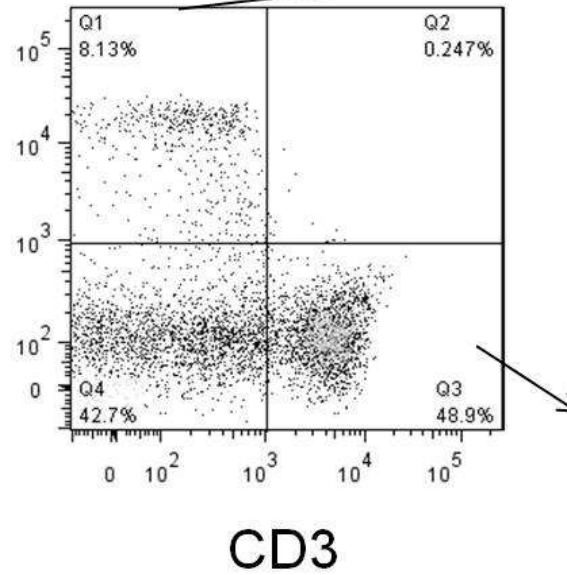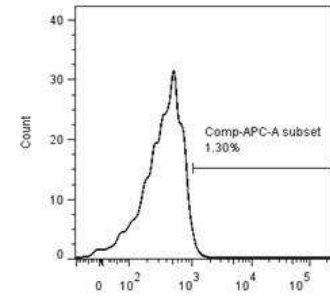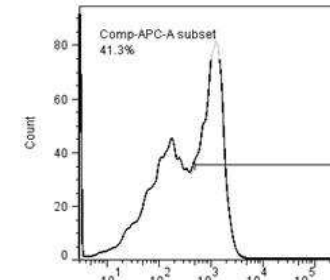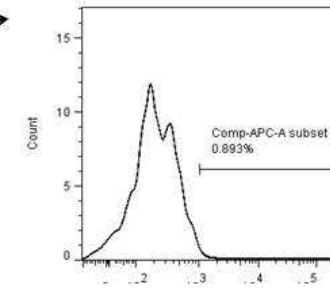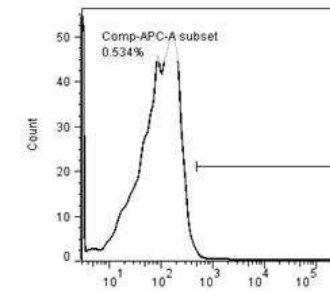

CD45RO

Supplement: NIHMS383601-supplement-3.pdf [file NIHMS383601-supplement-3.pdf]
